# Supplementary material for: AFSI: A Systems-Based Metric for Aquatic Food Security and SDG Governance
Source: Research Square preprint supplement (doi:10.21203/rs.3.rs-7956755/v1), 2025-10-29
Supplement: Supplementary file 1 [file b0d0378da12620550d7cb2d2.pdf]

Supplementary

**Table S1. Indicators used in the Aquatic Food Security Index (AFSI) framework**

| Dimension                           | Indicator                    | Description                                               | Unit            | Data Source                              | Year      |
|-------------------------------------|------------------------------|-----------------------------------------------------------|-----------------|------------------------------------------|-----------|
| <b>Ecological Integrity (EI)</b>    | Shannon Diversity Index      | Composite measure of fish species diversity               | unitless        | Field survey, Maejo University (2023)    | 2023      |
|                                     | Simpson Dominance Index      | Relative dominance of abundant species                    | unitless        | Field survey, Maejo University (2023)    | 2023      |
|                                     | Species Richness             | Total number of native freshwater species                 | species count   | MJU Aquatic Resources Database           | 2023      |
|                                     | Habitat Quality Score        | Derived from land use and riparian vegetation             | 0–1             | GISTDA, LDD (Land Development Dept.)     | 2022      |
| <b>Food Access (FA)</b>             | Market Accessibility         | Average travel time from community to nearest fish market | minutes         | Google Earth Engine (Travel Time Raster) | 2023      |
|                                     | Cold-chain Coverage          | Presence of cold storage and refrigerated transport       | 0–1             | DOF, Private logistics survey            | 2023      |
|                                     | Household Fish Consumption   | Average monthly per capita fish intake                    | kg/capita/month | NSO Household Consumption Survey         | 2021      |
| <b>Value Chain Resilience (VCR)</b> | Seasonal Volatility Index    | Coefficient of variation of fish price over 12 months     | unitless        | DOF Price Monitoring                     | 2022–2023 |
|                                     | Informal Trade Intensity     | Estimated daily transaction of unregistered trade         | THB/day         | Provincial Market Office, DOF            | 2023      |
|                                     | Local Enterprise Share       | Proportion of local fish enterprises to total             | %               | Provincial Commerce Office               | 2023      |
| <b>Governance Leverage (GL)</b>     | Local Co-management Presence | Existence of fisheries co-management groups               | binary (0–1)    | DOF–Community Fisheries Register         | 2023      |

| Dimension                         | Indicator                              | Description                                                  | Unit         | Data Source                            | Year      |
|-----------------------------------|----------------------------------------|--------------------------------------------------------------|--------------|----------------------------------------|-----------|
| <b>Spatial Vulnerability (SV)</b> | Budget Allocation to Aquatic Resources | % of provincial environment budget                           | %            | Provincial Administrative Organization | 2023      |
|                                   | Policy Participation Index             | % of community groups engaged in decision-making             | %            | Field survey (stakeholder interviews)  | 2023      |
|                                   | Flood Exposure Index                   | Weighted flood frequency (2010–2023)                         | 0–1          | GISTDA, RID Flood Risk Map             | 2023      |
|                                   | Drought Frequency                      | Number of drought events per decade                          | events/10 yr | RID, DWR                               | 2010–2023 |
|                                   | Ecosystem Service Overlap              | Spatial Jaccard index between ecosystem and protection zones | 0–1          | GISTDA, ONEP                           | 2023      |
